# Supplementary material for: In Vitro Investigation of the Interaction of Avian Metapneumovirus and Newcastle Disease Virus with Turkey Respiratory and Reproductive Tissue
Source: MDPI journal article supplement (doi:10.3390/v15040907), 2023-03-31
Supplement: s1 [file s1]

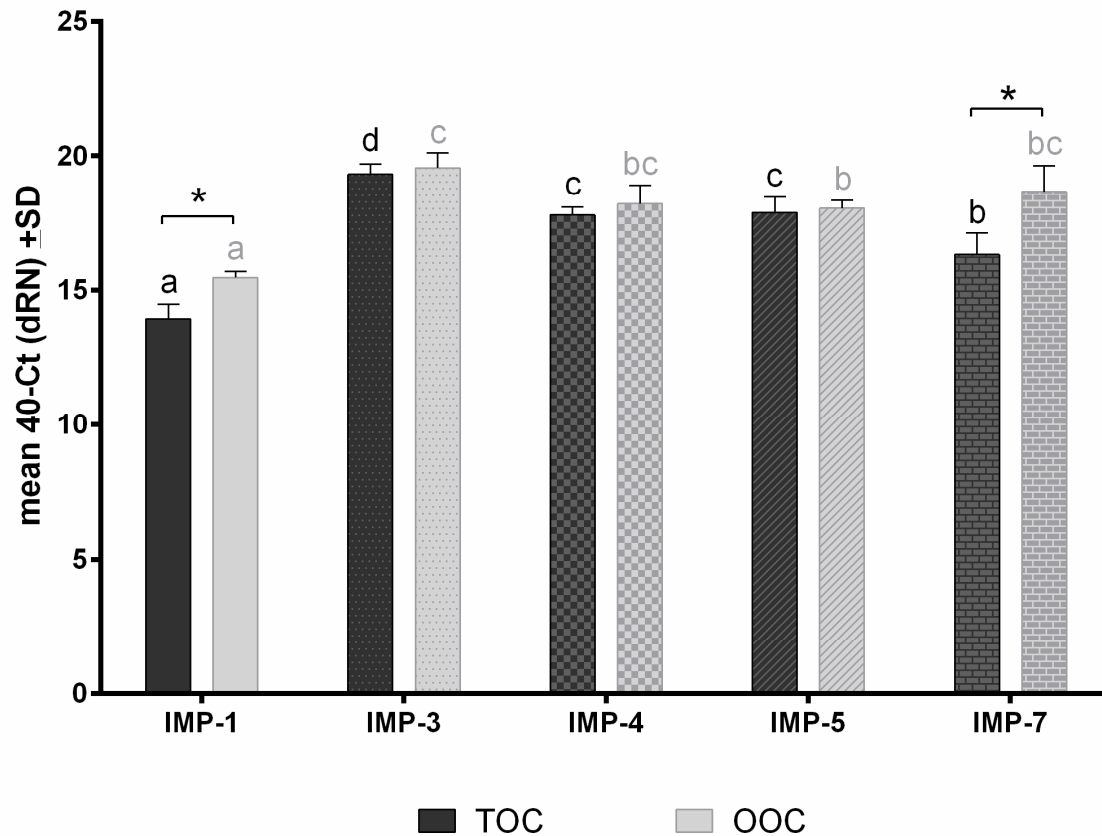

**Supplement Figure S2. mRNA expression of different importin- $\alpha$  isoforms in TOCs and OOCs.** The mRNA expression levels of importin- $\alpha$  1,3,4,5 and 7 were detected in virus-free TOCs or OOCs at 24 hours after adding 100 $\mu$ l virus-free medium by qRT-PCR Data are presented as mean 40-Ct-values. Small letters indicate significant differences between the investigated importins either in TOCs or OOCs, Tukey HSD all-pairwise comparison test (ANOVA  $p < 0.05$ ). Asterisks represent significant differences between both organs per importin, Two-sample  $t$ -test ( $p < 0.05$ ). Graph represent data of one representative experiment.
