# Supplementary material for: In Vitro Investigation of the Interaction of Avian Metapneumovirus and Newcastle Disease Virus with Turkey Respiratory and Reproductive Tissue
Source: Viruses. 2023 Mar 31;15(4):907. doi: 10.3390/v15040907 (PMC10144051; doi:10.3390/v15040907)
Supplement: Supplementary file 1 [file viruses-15-00907-s001.zip]

Archive with 6 entries (6 files):
- Supplement Figure S1.tif
- Supplement Figure S2.tif
- Supplement Figure S1.pdf
- Supplement Figure S2.pdf
- Supplement Table S2.xlsx
- Supplement Table S1.xlsx
