# Supplementary material for: In Vitro Investigation of the Interaction of Avian Metapneumovirus and Newcastle Disease Virus with Turkey Respiratory and Reproductive Tissue
Source: Viruses. 2023 Mar 31;15(4):907. doi: 10.3390/v15040907 (PMC10144051; doi:10.3390/v15040907)
Supplement: Supplementary file 1 [file viruses-15-00907-s001.zip › Supplement Table S1.xlsx]

## Sheet: Tabelle1
	RNA Target	Primer/Probea	Sequence (5`-3`)b	Accesion no.	Reference
		SH F	TAGTTTTGATCTTCCTTGTTGC
	AMPV-A	SH R	GTAGTTGTGCTCAGCTCTGATA	JF424833.1	Cecchinato et al., 2013
		MB-SH-A P	(Hex)-CGCGATCGTGGACCTCCTGCACTGTGGATCGCG-(TAMRA)
		SH F	TAGTTTTGATCTTCCTTGTTGC
	AMPV-B	SH R	GTAGTTGTGCTCAGCTCTGATA	AB548428.1	Cecchinato et al., 2013
		MB-SH-B P	(Fam)-CGCGATCATTGTGACAGCCAGCTTCACGACGCG-(TAMRA)
		ND-M F	AGTGATGTAGCTCGGACCTTC
	NDV	ND-M R	CCTGAGGAGAGGCATTTGCTA		Wise et al., 2004
		ND-M P	(FAM)-TTCTCTAGCAGTGGGACAGCCTGC-(TAMRA)
		tuIFN-λ F	CATCAGCCCTCTGGGAAAC
	IFN-λ	tuIFN-λ R	CCGCAGGTCGTTCAGTATTT	XM_003207378	Sid et al. 2016
		tuIFN-λ P	(FAM)-TGCAGAAGCTGGAGACAGCCAAA-(TAMRA)
	Importin-	KPNA-2 F	CTGTGTGGGCTGTAACTAACTA
	α1	KPNA-2 R	GCGGTAAGGAGATTCAGTAGAG	NM_001006209.1
		KPNA-2 P	(FAM)-CACAAGCGGTGGAACAATTGACCA-(BHQ-1)
	Importin-	KPNA-4 F	CCCTCATTTGGTTCCTCTTCTC
	α3	KPNA-4 R	GAACTACCTGTGTCTGCTCATC	NM_001007963.2
		KPNA-4 P	(FAM)-CGCTGAGAGCGGTAGGAAACATTGT-(BHQ-1)
	Importin-	KPNA-3 F	GAGAACCACCGCATCAAGAG
	α4	KPNA-3 R	CGTTTTGTGCTTTGAAGTCAGC	NM_001193575.1
		KPNA-3 P	(FAM)-AAC TTC AAG AAC AAA GGC CGC GAC-(BHQ-1)
	Importin-	KPNA-1 F	GAAGTCATAAGCACACCAGG
	α5	KPNA-1 R	ATATTTGTCAGCACCCAGGC	NM_001030774.1
		KPNA-1 P	(FAM)-TGGTGGCAAGATTTGTGGAGTTCCT-(BHQ-1)
	Importin-	KPNA-6 F	CGCTATTCTTCCTCCCTTGTT
	α7	KPNA-6 R	ATTCAGGTGGTGGACTCTTTC	NM_001012841.2
		KPNA-6 P	(FAM)-CACGAAATGCTGTTTGGGCCTTGT-(BHQ-1)
		RPL13 F	GGAGGAGAAGAACTTCAAGGC
	RPL13	RPL13 R	CCAAAGAGACGAGCGTTTG	NM_204999.1	Sewada et al.- 1996
		RPL13 F	(FAM)-CTTTGCCAGCCTGCGCATC-(BHQ-1)
	a F: forward primer; R: reverse primer, P: probe
	b BHQ-1: 6-carboxyfluorescein
	b TAMRA: carboxytetramethylrhodamine
