# Supplementary material for: In Vitro Investigation of the Interaction of Avian Metapneumovirus and Newcastle Disease Virus with Turkey Respiratory and Reproductive Tissue
Source: Viruses. 2023 Mar 31;15(4):907. doi: 10.3390/v15040907 (PMC10144051; doi:10.3390/v15040907)
Supplement: Supplementary file 1 [file viruses-15-00907-s001.zip › Supplement Table S2.xlsx]

## Sheet: Tabelle1
		Number positive/ number tested rings in one representative experiment
		Cilia loss					Epithelial flattening					Epithelial edema					Cell detachment
Tissue	Virus	24hpi	48hpi	72hpi	96hpi		24hpi	48hpi	72hpi	96hpi		24hpi	48hpi	72hpi	96hpi		24hpi	48hpi	72hpi	96hpi
TOC	AMPV-A	2/5	3/5	5/5	5/5		0/5	0/5	3/5	5/5		0/5	5/5	5/5	5/5		0/5	0/5	0/5	0/5
	AMPV-B	5/5	5/5	5/5	5/5		0/5	5/5	5/5	5/5		0/5	5/5	5/5	5/5		0/5	0/5	4/5	4/5
	NDV-HS	5/5	5/5	5/5	5/5		0/5	3/5	5/5	5/5		0/5	5/5	5/5	5/5		0/5	2/5	4/5	4/5
	NDV-KO	5/5	5/5	5/5	5/5		0/5	5/5	5/5	5/5		1/5	5/5	5/5	5/5		0/5	3/5	2/5	3/5
OOC	AMPV-A	0/5	2/5	3/5	5/5		0/5	0/5	0/5	0/5		0/5	0/5	0/5	0/5		0/5	0/5	0/5	0/5
	AMPV-B	1/5	3/5	3/5	5/5		0/5	0/5	0/5	3/5		0/5	0/5	0/5	2/5		0/5	0/5	0/5	0/5
	NDV-HS	1/5	5/5	5/5	5/5		0/5	0/5	5/5	5/5		0/5	0/5	0/5	5/5		0/5	0/5	0/5	0/5
	NDV-KO	1/5	3/5	5/5	5/5		0/5	0/5	0/5	2/5		0/5	0/5	0/5	3/5		0/5	0/5	0/5	0/5
